# Supplementary material
Source: PubMed Central journal article supplement (PMC7089617)
Supplement: NIHMS1048837-supplement-Supplement_1.pdf [file NIHMS1048837-supplement-Supplement_1.pdf]

**SUPPLEMENT MATERIAL (Measure S1)**

**Supplementary Material for the Article:**

Factor structure, internal reliability and construct validity of the Methadone Maintenance Treatment Sigma Mechanisms Scale (MMT-SMS)

**Author Names and Affiliations:**

**Laramie R. Smith**; Ph.D.; Division of Infectious Diseases and Global Public Health, University of California San Diego, La Jolla, CA, United States

**Maria Luisa Mittal**; M.D.; Division of Infectious Diseases and Global Public Health, University of California San Diego, La Jolla, CA, United States

**Karla Wagner**; Ph.D.; School of Community Health Sciences, University of Nevada, Reno, Reno, NV

**Michael M. Copenhaver**; Ph.D.; University of Connecticut, Storrs, CT, United States

**Chinazo O. Cunningham**; M.D., M.S.; Albert Einstein College of Medicine and Montefiore Medical Center, Bronx, NY, United States

**Valerie A. Earnshaw**; Ph.D.; Department of Human Development and Family Sciences, University of Delaware, Newark, DE, United States

**Corresponding Author:**

Laramie R. Smith, [laramie@ucsd.edu](mailto:laramie@ucsd.edu), Division of Global Public Health, University of California San Diego, 9500 Gilman Dr. #0507, La Jolla, CA 92093, USA

**This material supplements, but does not replace, the peer-reviewed paper in *Addiction*.**

# Methadone Maintenance Treatment Stigma Mechanism Scale (MMT-SMS)

**Co-developed by:** Laramie R. Smith, Ph.D. and Valerie A. Earnshaw, Ph.D.

**Citation:** Smith LR, Mittal ML, Wagner K, Copenhaver MM, Cunningham CO, Earnshaw VA. Factor structure, internal reliability and construct validity of the Methadone Maintenance Treatment Sigma Mechanisms Scale (MMT-SMS). 2019. *Addiction*. doi: 10.1111/add.14799.

**Intended use:** The MMT-SMS was developed for use in a diverse range of populations receiving MMT. It may be adapted for persons experienced with other forms of medication-assisted therapy for opioid use disorders accordingly.

**Scoring:** All responses are given on a 5-point Likert-type scale, with higher scores indicating greater endorsement of MMT stigma. Enacted (6 items), Anticipated (6 items), and Internalized (7 items) scales can be created by taking the average of the item responses given for each stigma mechanism respectively. Stigma source sub-scales can be created for Enacted and Anticipated stigma by taking the average responses given for the family members (3 items) employers (3 items) and healthcare worker (3 items) item responses respectively.

**Instructions:** The following questions ask about **receiving methadone maintenance treatment**. Please think about each question and circle your answer. The first group of questions asks you about how people will treat you in the **future** because of your methadone maintenance treatment. The second group of questions asks you about how people have treated you in the **past** because of your methadone maintenance treatment. The third group of questions asks about how you feel about your methadone maintenance treatment.

**ANTICIPATED STIGMA** (header can be omitted in survey)

How likely is it that people will treat you in the following ways in the **future** because you **receive methadone**?

|    |                                                                                       | Very unlikely | Unlikely | Neither unlikely nor likely | Likely | Very Likely |
|----|---------------------------------------------------------------------------------------|---------------|----------|-----------------------------|--------|-------------|
| 1. | Family members will think that I'm still a drug user.                                 | 1             | 2        | 3                           | 4      | 5           |
| 2. | Family members will not support my methadone treatment.                               | 1             | 2        | 3                           | 4      | 5           |
| 3. | Family members will think that I cannot recover.                                      | 1             | 2        | 3                           | 4      | 5           |
| 4. | Employers will think that I'm still a drug user.                                      | 1             | 2        | 3                           | 4      | 5           |
| 5. | Employers will think that I'm a bad employee.                                         | 1             | 2        | 3                           | 4      | 5           |
| 6. | Employers will think that managing my methadone treatment schedule will be a problem. | 1             | 2        | 3                           | 4      | 5           |
| 7. | Healthcare workers will think that I'm still a drug user.                             | 1             | 2        | 3                           | 4      | 5           |
| 8. | Healthcare workers will give me poor care.                                            | 1             | 2        | 3                           | 4      | 5           |
| 9. | Healthcare workers will not prescribe me medication that I need.                      | 1             | 2        | 3                           | 4      | 5           |

**ENACTED STIGMA** (header can be omitted in survey)How often have people treated you this way in the **past** because you **receive methadone**?

|     |                                                                                      | Never | Not Often | Somewhat Often | Often | Very Often |
|-----|--------------------------------------------------------------------------------------|-------|-----------|----------------|-------|------------|
| 10. | Family members have thought that I'm still a drug user.                              | 1     | 2         | 3              | 4     | 5          |
| 11. | Family members have not supported my methadone treatment.                            | 1     | 2         | 3              | 4     | 5          |
| 12. | Family members have thought that I cannot recover.                                   | 1     | 2         | 3              | 4     | 5          |
| 13. | Employers have thought that I'm still a drug user.                                   | 1     | 2         | 3              | 4     | 5          |
| 14. | Employers have thought that I'm a bad employee.                                      | 1     | 2         | 3              | 4     | 5          |
| 15. | Employers have thought that managing my methadone dosage schedule will be a problem. | 1     | 2         | 3              | 4     | 5          |
| 16. | Healthcare workers have thought that I'm still a drug user.                          | 1     | 2         | 3              | 4     | 5          |
| 17. | Healthcare workers have given me poor treatment.                                     | 1     | 2         | 3              | 4     | 5          |
| 18. | Healthcare workers have not prescribed me medication that I needed.                  | 1     | 2         | 3              | 4     | 5          |

**INTERNALIZED STIGMA** (header can be omitted in survey)How do you feel about **your own methadone treatment**?

|     |                                                                        | Strongly disagree | Disagree | Neither disagree nor agree | Agree | Strongly agree |
|-----|------------------------------------------------------------------------|-------------------|----------|----------------------------|-------|----------------|
| 19. | Receiving methadone makes me feel like I'm a bad person.               | 1                 | 2        | 3                          | 4     | 5              |
| 20. | I feel I'm not as good as others because I receive methadone.          | 1                 | 2        | 3                          | 4     | 5              |
| 21. | I feel ashamed of my methadone treatment.                              | 1                 | 2        | 3                          | 4     | 5              |
| 22. | I think less of myself because I receive methadone.                    | 1                 | 2        | 3                          | 4     | 5              |
| 23. | Receiving methadone makes me feel unclean.                             | 1                 | 2        | 3                          | 4     | 5              |
| 24. | Being on methadone treatment is disgusting to me.                      | 1                 | 2        | 3                          | 4     | 5              |
| 25. | Being on methadone treatment makes me feel like I'm still a drug user. | 1                 | 2        | 3                          | 4     | 5              |
