# Supplementary material
Source: PubMed Central journal article supplement (PMC7089617)
Supplement: NIHMS1048837-supplement-Supplement_2.pdf [file NIHMS1048837-supplement-Supplement_2.pdf]

## SUPPLEMENT MATERIAL (Measure S2)

### Supplementary Material for the Article:

Factor structure, internal reliability and construct validity of the Methadone Maintenance Treatment Sigma Mechanisms Scale (MMT-SMS)

#### Author Names and Affiliations:

**Laramie R. Smith**; Ph.D.; Division of Infectious Diseases and Global Public Health, University of California San Diego, La Jolla, CA, United States

**Maria Luisa Mittal**; M.D.; Division of Infectious Diseases and Global Public Health, University of California San Diego, La Jolla, CA, United States

**Karla Wagner**; Ph.D.; School of Community Health Sciences, University of Nevada, Reno, Reno, NV

**Michael M. Copenhaver**; Ph.D.; University of Connecticut, Storrs, CT, United States

**Chinazo O. Cunningham**; M.D., M.S.; Albert Einstein College of Medicine and Montefiore Medical Center, Bronx, NY, United States

**Valerie A. Earnshaw**; Ph.D.; Department of Human Development and Family Sciences, University of Delaware, Newark, DE, United States

#### Corresponding Author:

Laramie R. Smith, [laramie@ucsd.edu](mailto:laramie@ucsd.edu), Division of Global Public Health, University of California San Diego, 9500 Gilman Dr. #0507, La Jolla, CA 92093, USA

**This material supplements, but does not replace, the peer-reviewed paper in *Addiction*, and reflects partial supplemental material previously published in the journal of *Drug and Alcohol Dependence*.**

# Substance Use Stigma Mechanism Scale (SU-SMS)

\*This version of the SU-SMS includes anticipated and enacted stigma subscales from three stigma sources: family members, employers, and healthcare workers. The employer stigma source subscale was omitted in the initial validation of this measure to accommodate its comparison with the HIV Stigma Mechanisms Scale. The initial validation of this measure was published in the *Journal of Drug and Alcohol Dependence*, cited below.

**Co-developed by:** Laramie R. Smith, Ph.D. and Valerie A. Earnshaw, Ph.D.

**Citation:** Smith LR, Earnshaw VA, Copenhaver MM, Cunningham C. Substance use stigma: Reliability and validity of a theory-based scale for substance-using populations. 2016. *Drug Alcohol Dependence*; 162:34-43. doi: 10.1016/j.drugalcdep.2016.02.019.

**Intended use:** The SU-SMS was developed for use in a diverse range of substance using populations. It can be adapted for persons affected by alcohol use and/or drug use disorders accordingly. The SU-SMS may be administered to substance-using populations more broadly, including those who are out-of-treatment, non-treatment seeking, treatment-seeking, and in-treatment for substance use disorders.

**Scoring:** All responses are given on a 5-point Likert-type scale, with higher scores indicating greater endorsement of substance use stigma. Enacted (9 items), Anticipated (9 items), and Internalized (6 items) scales can be created by taking the average of the item responses given for each stigma mechanism respectively. Stigma source sub-scales can be created for Enacted and Anticipated stigma by taking the average responses given for the family members (3 items), employers\* (3 items), and healthcare workers (3 items) and item responses respectively.

---

**Instructions:** The following questions ask about your **alcohol and/or drug use history**, this includes any past or current experiences using alcohol and/or drugs. Please think about each question and circle your answer. The first group of questions asks about how people will treat you **in the future** because of your alcohol and/or drug use history. The second group of questions asks about how people have treated you **in the past** because of alcohol and/or drug use history. The third group of questions asks about how you feel about your alcohol and/or drug use history.

## ANTICIPATED STIGMA (header can be omitted in survey)

How likely is it that people will treat you in the following ways **in the future** because of your **alcohol and/or drug use history**?

|    |                                                     | Very unlikely | Unlikely | Neither unlikely nor likely | Likely | Very likely |
|----|-----------------------------------------------------|---------------|----------|-----------------------------|--------|-------------|
| 1. | Family members will think that I cannot be trusted. | 1             | 2        | 3                           | 4      | 5           |
| 2. | Family members will look down on me.                | 1             | 2        | 3                           | 4      | 5           |
| 3. | Family members will treat me differently.           | 1             | 2        | 3                           | 4      | 5           |
| 4. | Employers will not trust me in the workplace.       | 1             | 2        | 3                           | 4      | 5           |
| 5. | Employers will discriminate against me.             | 1             | 2        | 3                           | 4      | 5           |
| 6. | Employers will not give me promotions.              | 1             | 2        | 3                           | 4      | 5           |
| 7. | Healthcare workers will not listen to my concerns.  | 1             | 2        | 3                           | 4      | 5           |

|    |                                                                                                                                          |   |   |   |   |   |
|----|------------------------------------------------------------------------------------------------------------------------------------------|---|---|---|---|---|
| 8. | Healthcare workers will think that I'm pill shopping, or trying to con them into giving me prescription medications to get high or sell. | 1 | 2 | 3 | 4 | 5 |
| 9. | Healthcare workers will give me poor care.                                                                                               | 1 | 2 | 3 | 4 | 5 |

**ENACTED STIGMA** (header can be omitted in survey)

How often have people treated you this way **in the past** because of your **alcohol and/or drug use history**?

|    |                                                                                                                                            | Never | Not often | Somewhat often | Often | Very Often |
|----|--------------------------------------------------------------------------------------------------------------------------------------------|-------|-----------|----------------|-------|------------|
| 1. | Family members have thought that I cannot be trusted.                                                                                      | 1     | 2         | 3              | 4     | 5          |
| 2. | Family members have looked down on me.                                                                                                     | 1     | 2         | 3              | 4     | 5          |
| 3. | Family members have treated me differently.                                                                                                | 1     | 2         | 3              | 4     | 5          |
| 4. | Employers have not trusted me in the workplace.                                                                                            | 1     | 2         | 3              | 4     | 5          |
| 5. | Employers have discriminated against me.                                                                                                   | 1     | 2         | 3              | 4     | 5          |
| 6. | Employers have not given me promotions.                                                                                                    | 1     | 2         | 3              | 4     | 5          |
| 7. | Healthcare workers have not listened to my concerns.                                                                                       | 1     | 2         | 3              | 4     | 5          |
| 8. | Healthcare workers have thought that I'm pill shopping, or trying to con them into giving me prescription medications to get high or sell. | 1     | 2         | 3              | 4     | 5          |
| 9. | Healthcare workers have given me poor care.                                                                                                | 1     | 2         | 3              | 4     | 5          |

**INTERNALIZED STIGMA** (header can be omitted in survey)

How do you **feel** about your alcohol and/or drug use history?

|    |                                                                       | Strongly disagree | Disagree | Neither disagree nor agree | Agree | Strongly agree |
|----|-----------------------------------------------------------------------|-------------------|----------|----------------------------|-------|----------------|
| 1. | Having used alcohol and/or drugs makes me feel like I'm a bad person. | 1                 | 2        | 3                          | 4     | 5              |
| 2. | I feel I'm not as good as others because I used alcohol and/or drugs. | 1                 | 2        | 3                          | 4     | 5              |
| 3. | I feel ashamed of having used alcohol and/or drugs.                   | 1                 | 2        | 3                          | 4     | 5              |
| 4. | I think less of myself because I used alcohol and/or drugs.           | 1                 | 2        | 3                          | 4     | 5              |
| 5. | Having used alcohol and/or drugs makes me feel unclean.               | 1                 | 2        | 3                          | 4     | 5              |
| 6. | Having used alcohol and/or drugs is disgusting to me.                 | 1                 | 2        | 3                          | 4     | 5              |
